# Supplementary material for: Vaborbactam: Spectrum of Beta-Lactamase Inhibition and Impact of Resistance Mechanisms on Activity in Enterobacteriaceae
Source: PubMed Central journal article supplement (PMC5655098; doi:10.1128/aac.01443-17), 2017-10-24
Supplement: AAC.01443-17_zac011176634s1.pdf [file AAC.01443-17_zac011176634s1.pdf]

1 **Control number:** AAC01443-17

2 **Manuscript title:** Vaborbactam: Spectrum of Beta-Lactamase Inhibition and Impact of Resistance Mechanisms on Activity in Enterobacteriaceae

3

4

5 **Table S1. Primer sequences used in cloning various beta-lactamase genes and in reverse transcription-quantitative PCR (RT-qPCR)**

6

| Cloning of beta-lactamase genes |                       |             |                                                |                        |
|---------------------------------|-----------------------|-------------|------------------------------------------------|------------------------|
| Source strain                   | Cloned beta-lactamase | Primer name | Primer sequence (5' to 3')                     | Restriction site added |
| KP1004                          | KPC-2                 | KPC-2-own-F | ACACGAATTC CAAGGAATATCGTTGATGTCACTGTATCGCCGTC  | <i>EcoRI</i>           |
|                                 |                       | KPC-2-R1    | ACACAAGCTT TACTGCCCCGTTGACGCCAA                | <i>HindIII</i>         |
| EC1007                          | KPC-3                 | KPC-2-own-F | ACACGAATTC CAAGGAATATCGTTGATGTCACTGTATCGCCGTC  | <i>EcoRI</i>           |
|                                 |                       | KPC-2-R1    | ACACAAGCTT TACTGCCCCGTTGACGCCAA                | <i>HindIII</i>         |
| SM1000                          | SME-2                 | SME-2-F1    | ACACGGATCC AGGAGGTTAATTCTGATGTCAAACAAAG        | <i>BamHI</i>           |
|                                 |                       | SME-2-R1    | ACACAAGCTT TTAATCAATTGCCTGAATTG                | <i>HindIII</i>         |
| ECL1004                         | NMC-A                 | NMC-A-F2    | ACGCGAATTC ATATAAGGTAACCATGTCACTTAATGTAAAGC    | <i>EcoRI</i>           |
|                                 |                       | NMC-A-R1    | ACACGGATCC TTATTAAAGTTATCAATTGC                | <i>BamHI</i>           |
| ECM6625                         | SHV-5                 | SHV-12-F2   | ACGCGAATTC GGATGTATTGTGGTTATGCGTTATATTCGCCTGTG | <i>EcoRI</i>           |

|         |          |             |                                                |                |
|---------|----------|-------------|------------------------------------------------|----------------|
| KP1010  | SHV-12   | SHV-12-R1   | ACACA <u>AAGCTT</u> TTAGCGTTGCCAGTGCTCGA       | <i>HindIII</i> |
|         |          | SHV-12-F2   | ACGCGAATTC GGATGTATTGTGGTTATGCGTTATATTGCCTGTG  | <i>EcoRI</i>   |
| KP1012  | SHV-18   | SHV-12-R1   | ACACA <u>AAGCTT</u> TTAGCGTTGCCAGTGCTCGA       | <i>HindIII</i> |
|         |          | SHV-12-F2   | ACGCGAATTC GGATGTATTGTGGTTATGCGTTATATTGCCTGTG  | <i>EcoRI</i>   |
| ECM6619 | TEM-10   | TEM-26-F1   | ACGCGAATTC GAAAAAGGAAGAGTATGAGTATTCAACATTTCCG  | <i>EcoRI</i>   |
|         |          | TEM-26-R1   | ACACA <u>AAGCTT</u> TACCAATGCTTAATCAGTGAGGC    | <i>HindIII</i> |
| ECM6621 | TEM-26   | TEM-26-F1   | ACGCGAATTC GAAAAAGGAAGAGTATGAGTATTCAACATTTCCG  | <i>EcoRI</i>   |
|         |          | TEM-26-R1   | ACACA <u>AAGCTT</u> TACCAATGCTTAATCAGTGAGGC    | <i>HindIII</i> |
| EC1008  | CTX-M-3  | CTX-M-3-F2  | ACGCGAATTC AGAATAAGGAATCCCATGGTTAAAAAATCACTGCG | <i>EcoRI</i>   |
|         |          | CTX-M-3-R1  | ACACA <u>AAGCTT</u> TTACAAACCGTCGGTGACG        | <i>HindIII</i> |
| KP1005  | CTX-M-14 | CTX-M-14-F1 | ACGCGAATTC AGGAGGTTAATTCTGATGGTGACAAAGAGAGTGCA | <i>EcoRI</i>   |
|         |          | CTX-M-14-R1 | ACACA <u>AAGCTT</u> TTACAGCCCTTCGGCGATG        | <i>HindIII</i> |
| KP1009  | CTX-M-15 | CTX-M-15-F1 | ACACGAATTC AGGAGGTTATCGTTGATGGTTAAAAAATCACTGCG | <i>EcoRI</i>   |
|         |          | CTX-M-15-R1 | ACACA <u>AAGCTT</u> TTACAAACCGTTGGTGACGA       | <i>HindIII</i> |
| EC1014  | DHA-1    | DHA-1-F1    | ACGCGAATTC GGAAGGTTAATTCTGATGAAAAATCGTTATCTGC  | <i>EcoRI</i>   |
|         |          | DHA-1-R1    | ACACA <u>AAGCTT</u> TTATTCCAGTGCACTCAAATAG     | <i>HindIII</i> |
| EC1016  | FOX-5    | FOX-5-F2    | ACGCGAATTC CACGAGAATAGCCATATGCAACAACGGCGTGCG   | <i>EcoRI</i>   |
|         |          | FOX-5-R1    | ACACA <u>AAGCTT</u> TCACTCGGCCAACTGACTCA       | <i>HindIII</i> |

|         |        |               |                                                    |                |
|---------|--------|---------------|----------------------------------------------------|----------------|
| ECL1002 | P99    | P99-F2        | ACGCGAATTC GACTCGCTATTACGGAAGAT                    | <i>EcoRI</i>   |
|         |        | P99-HIS-R2    | ACACAAGCTT TTAGTGGTGATGATGGTGATGCTGTAGCGCCTCGAGGA  | <i>HindIII</i> |
| KP1013  | CMY-2  | CMY-2-F2      | ACGCGAATTC TACGGAACTGATTTTCATGATGAAAAAATCGTTATGC   | <i>EcoRI</i>   |
|         |        | CMY-2-R1      | ACACAAGCTT TTATTGCAGCTTTTCAAGAATGC                 | <i>HindIII</i> |
| KX1000  | OXA-2  | OXA-2-F2      | ACACGGATCC ATTAAGGAAAAGTTAATGGCAATCCGAATCTTCGC     | <i>BamHI</i>   |
|         |        | OXA-2-R1      | ACACAAGCTT TTATCGCGCAGCGTCCGAGT                    | <i>HindIII</i> |
| KP1007  | OXA-10 | Oxa-10-F2     | ACACGAATTC CACCAAGAAGGTGCCATGAAAACATTTGCCGCAT      | <i>EcoRI</i>   |
|         |        | Oxa-10-R1     | ACACAAGCTT TTAGCCACCAATGATGCCCT                    | <i>HindIII</i> |
| EC1062  | OXA-48 | Oxa-48-F2     | ACACGAATTC AAGCAAGGGGACGTTATGCGTGTATTAGCC          | <i>EcoRI</i>   |
|         |        | Oxa-48-HIS-R1 | ACACAAGCTT<br>CTAGTGGTGATGATGGTGATGGGAATAATTTTTCTG | <i>HindIII</i> |
| KP1081  | NDM-1  | NDM1-F2       | ACACGAATTC GCTGAATAAAAGGAAAAGTTG                   | <i>EcoRI</i>   |
|         |        | NDM1-HIS-R1   | ACACAAGCTT TCAGTGGTGATGATGGTGATGGCGCAGCTTGTCGGCCA  | <i>HindIII</i> |
| KP1014  | VIM-1  | VIM-1-F2      | ACGCGAATTC CCCTATGGAGTCTTGATGTAAAAGTTATTAGTAG      | <i>EcoRI</i>   |
|         |        | VIM-1-R1      | ACACAAGCTT CTA CTCTCGGCGACTGAGCGATT                | <i>HindIII</i> |
| Pa1066  | VIM-2  | VIM-2-own-F   | ACACGAATTC ACAAAGTTATGCCGCACTC                     | <i>EcoRI</i>   |
|         |        | VIM-2-P24-R   | ACATAAGCTT CTA CTCAACGACTGAGCGAT                   | <i>HindIII</i> |
| Pa1070  | VIM-7  | VIM-7-own-F   | ACACGGATCC ACAAAGTTATCGCAGTCGG                     | <i>BamHI</i>   |
|         |        | VIM-7-P24-R   | ACATAAGCTT ACTCGGCCACCGGGCGTACTTT                  | <i>HindIII</i> |

|         |        |                   |                                                |                |
|---------|--------|-------------------|------------------------------------------------|----------------|
| Pa1068  | SPM-1  | SPM-1-own-F1      | ACACGAATTC TTATCGGAGATCGGAATGAAC               | <i>EcoRI</i>   |
|         |        | SPM-1-P24-R1      | ACACAAGCTT CTACAGTCTCATTTCGCCAA                | <i>HindIII</i> |
| Pa1069  | GIM-1  | GIM-1-own-F       | ACACGGATCC AGTTAGAAGGATGATTTCC                 | <i>BamHI</i>   |
|         |        | GIM-1-P24-R       | ACATCTGCAG TTAATCAGCCGACGCTTCAGC               | <i>PstI</i>    |
| Pa1064  | IMP-13 | PA-IMP-own-F      | ACGCGAATTC TAGAAAAGGDWARGTATGAA                | <i>EcoRI</i>   |
|         |        | PA-IMP-R          | ACGCGGATCC GTTAGAAAWTTAGYACTTGG                | <i>BamHI</i>   |
| Pa1067  | IMP-15 | PA-IMP-own-F      | ACGCGAATTC TAGAAAAGGDWARGTATGAA                | <i>EcoRI</i>   |
|         |        | PA-IMP-R          | ACGCGGATCC GTTAGAAAWTTAGYACTTGG                | <i>BamHI</i>   |
| Pa1065  | IMP-18 | PA-IMP-own-F      | ACGCGAATTC TAGAAAAGGDWARGTATGAA                | <i>EcoRI</i>   |
|         |        | PA-IMP-R          | ACGCGGATCC GTTAGAAAWTTAGYACTTGG                | <i>BamHI</i>   |
| ECM6846 | CcrA   | BF-ccrA-own-F     | ACGCGAATTC ATATAAAGAATAAAAATGAAAACAGTATTTATCC  | <i>EcoRI</i>   |
|         |        | BF-ccrA-R         | ACGCAAGCTT CTATGGCTTTGAAGTGCTTTC               | <i>HindIII</i> |
| SMM1020 | L1     | SM-K279a-L1-own-F | ACACGAATTC AAGCGGACGTGGATCATGCGTTTTACCCTGCTCGC | <i>EcoRI</i>   |
|         |        | SM-K279a-L1-R     | ACATAAGCTT TCAGCGGGTCCCGGCCGTTT                | <i>HindIII</i> |

### Reverse transcription-quantitative PCR

| Primer      | Gene        | Primer sequence (5' to 3') | Used for |
|-------------|-------------|----------------------------|----------|
| KP-acrB-qF2 | <i>acrB</i> | CCGGTATCGCGTTCGTTTCGC      | qPCR     |
| KP-acrB-qR2 |             | AGTTTTTCGTGGCCCAGACCCG     | RT; qPCR |

|              |               |                            |          |
|--------------|---------------|----------------------------|----------|
| KP-ompK35-qF | <i>ompK35</i> | CAACCAGCTGGACGACAACGA      | qPCR     |
| KP-ompK35-qR |               | AGAATTGGTAAACGATACCCACG    | RT; qPCR |
| KP-ompK36-qF | <i>ompK36</i> | GTGGTTGCTCAGTACCAGTTC      | qPCR     |
| KP-ompK36-qR |               | GCTGTTGTCGTCCAGCAGGTTG     | RT; qPCR |
| KP-rpoB-qF   | <i>rpoB</i>   | AAGGCGAATCCAGCTTGTTTCAGC   | qPCR     |
| KP-rpoB-qR   |               | TGACGTTGCATGTTTCGCACCCATCA | RT; qPCR |

7

8 All source strains are part of the Medicines Company strain collection. Abbreviations of species that served as a source of cloned genes: KP, *Klebsiella pneumoniae*; SM, *Serratia*  
9 *marcescens*; ECL, *Enterobacter cloacae*, ECM or EC, *Escherichia coli*; KX, *Klebsiella oxytoca*; Pa, *Pseudomonas aeruginosa*; SMM, *Stenotrophomonas maltophilia*.

10 Sequences corresponding to restriction sites are underlined.

11 qPCR, quantitative PCR; RT, reverse transcription

12

13 Table S2. The panel of isogenic strains with various combinations of efflux and porin mutations and clinical strains used in this study

| Strains              | Beta-lactamase                    | Parent strain/Recipient | Relevant genotype                         | Construction/ selection/ source                                                                                              |
|----------------------|-----------------------------------|-------------------------|-------------------------------------------|------------------------------------------------------------------------------------------------------------------------------|
| KPM1001 (ATCC 43816) | SHV-24 <sup>1</sup>               | NA                      | Wild type                                 | ATCC                                                                                                                         |
| KPM1026a             | SHV-24                            | KPM1001                 | Wild type                                 | Selected from ATCC 43816 on 200 µg/ml of streptomycin, K88R in S12                                                           |
| KPM1271              | SHV-24, KPC-3, TEM-1 <sup>2</sup> | KPM1026a                | Wild type                                 | Conjugation of pKpQIL with <i>bla</i> <sub>KPC-3</sub> from KP1074 into KPM1026a                                             |
| KPM1004              | SHV-24                            | ATCC 43816              | <i>ramR</i>                               | Selected from ATCC 43816 on 4 µg/ml of tigecycline, 8bp insertion in <i>ramR</i> causing a frame-shift from amino acid no.46 |
| KPM1027              | SHV-24                            | KPM1004                 | <i>ramR</i>                               | Selected from KPM1027 on 200 µg/ml of streptomycin, K43T in S12                                                              |
| KPM1272              | SHV-24, KPC-3, TEM-1              | KPM1027                 | <i>ramR</i>                               | Conjugation of pKpQIL with <i>bla</i> <sub>KPC-3</sub> from KP1074 into KPM1027                                              |
| KPM1176              | SHV-24                            | KPM1027                 | <i>ramR</i> , <i>ompK36_1176</i>          | Selected from KPM1027 on 0.25 µg/ml of meropenem; carries frame-shift from amino acid no. 266 in <i>OmpK36</i>               |
| KPM2067              | SHV-24, KPC-3, TEM-1              | KPM1271                 | <i>ompK36_2067</i>                        | Selected from KPM1271 on meropenem 2 µg/ml and vaborbactam 2 µg/ml; frame-shift from amino acid no. 54 of <i>OmpK36</i>      |
| KPM2040              | SHV-24                            | KPM2067                 | <i>ompK36_2067</i>                        | pKpQIL plasmid with <i>bla</i> <sub>KPC-3</sub> cured from KPM2067                                                           |
| KPM2600              | SHV-24                            | KPM1026a                | $\Delta$ <i>ompK35</i>                    | <i>ompK35</i> disrupted in KPM1026a                                                                                          |
| KPM2601              | SHV-24, KPC-3, TEM-1              | KPM2600                 | $\Delta$ <i>ompK35</i>                    | Conjugation of pKpQIL with <i>bla</i> <sub>KPC-3</sub> from KP1074 into KPM2600                                              |
| KPM2610              | SHV-24                            | KPM1027                 | <i>ramR</i> $\Delta$ <i>ompK35</i>        | <i>ompK35</i> disrupted in KPM1027                                                                                           |
| KPM2828              | SHV-24, KPC-3, TEM-1              | KPM2610                 | <i>ramR</i> $\Delta$ <i>ompK35</i>        | Conjugation of pKpQIL with <i>bla</i> <sub>KPC-3</sub> from KP1074 into KPM2610                                              |
| KPM2613              | SHV-24                            | KPM2040                 | <i>ompK36_2040</i> $\Delta$ <i>ompK35</i> | <i>ompK35</i> disrupted in KPM2040                                                                                           |
| KPM2631              | SHV-24, KPC-3, TEM-1              | KPM2613                 | <i>ompK36_2040</i> $\Delta$ <i>ompK35</i> | Conjugation of pKpQIL with <i>bla</i> <sub>KPC-3</sub> from KP1074 into KPM2613                                              |

|         |                                    |                  |                                                      |                                                                                                                            |          |
|---------|------------------------------------|------------------|------------------------------------------------------|----------------------------------------------------------------------------------------------------------------------------|----------|
| KPM2966 | SHV-24                             | KPM2613          | <i>ramR ompK36_2040 ΔompK35</i>                      | Selected from KPM2613 on 2 µg/ml of tigecycline, TAA at amino acid no. 164 of RamR                                         | 14       |
| KPM2965 | SHV-24, KPC-3, TEM-1               | KPM2631          | <i>ramR ompK36_2040 ΔompK35</i>                      | Selected from KPM2631 on 4 µg/ml of tigecycline, 8bp insertion in <i>ramR</i> causing a frame-shift from amino acid no. 50 | 15<br>16 |
| KPM2592 | SHV-24                             | KPM1026a         | <i>ΔompK36</i>                                       | <i>ompK36</i> disrupted in KPM1026a                                                                                        | 17       |
| KPM2599 | SHV-24, KPC-3, TEM-1               | KPM2592          | <i>ΔompK36</i>                                       | Conjugation of pKpQIL with <i>bla</i> <sub>KPC-3</sub> from KP1074 into KPM2592                                            | 18       |
| KPM2658 | SHV-24                             | KPM1027          | <i>ramR ΔompK36</i>                                  | <i>ompK36</i> disrupted in KPM1027                                                                                         | 19       |
| KPM2818 | SHV-24, KPC-3, TEM-1               | KPM2658          | <i>ramR ΔompK36</i>                                  | Conjugation of pKpQIL with <i>bla</i> <sub>KPC-3</sub> from KP1074 into KPM2658                                            | 20       |
| KP1074  | SHV-11 <sup>3</sup> , KPC-3, TEM-1 | Clinical isolate | <i>ompK35_fs42<sup>4</sup> ompK36_GD<sup>5</sup></i> | The Medicines Company strain collection                                                                                    | 21<br>22 |
| KPM1308 | SHV-11                             | KPM1074          | <i>ompK35_fs42 ompK36_GD</i>                         | pKpQIL plasmid cured from KP1074 and streptomycin resistant mutant was selected                                            | 23<br>24 |
| KPM2617 | SHV-11                             | KPM1308          | <i>ompK35_fs42 ΔompK36</i>                           | <i>ompK36</i> disrupted in KPM1308                                                                                         | 25<br>26 |
| KPM2644 | SHV-11, KPC-3, TEM-1               | KPM2617          | <i>ompK35_fs42 ΔompK36</i>                           | Conjugation of pKpQIL with <i>bla</i> <sub>KPC-3</sub> from KP1074 into KPM2617                                            | 27<br>28 |
| KP1004  | SHV-11, KPC-3, TEM-1               | Clinical isolate | <i>ompK35_fs42 ompK36</i> wild-type                  | The Medicines Company strain collection                                                                                    | 29<br>30 |

31

32 <sup>1</sup>SHV-24 is a chromosomally encoded beta-lactamase in all ATCC 43816/KPM1026a derivatives

33 <sup>2</sup>The *bla*<sub>TEM-1</sub> gene is located on pKpQIL plasmid along with *bla*<sub>KPC-3</sub>

34 <sup>3</sup>SHV-11 is a chromosomally encoded beta-lactamase in KP1074 and KP1004.

35 <sup>4</sup>fs42, frame-shift in *OmpK35* at amino acid no. 42 that results in non-functional protein

36 <sup>5</sup>Duplication of two amino acids, Gly134 and Asp135, located within the L3 internal loop and associated with the reduced susceptibility to carbapenems due to constriction of the  
37 channel (29).

38

39

40 **Table S3. The effect of varying vaborbactam concentrations on aztreonam MICs in *E. coli* strains expressing various cloned beta-**  
 41 **lactamases**

| Strain  | Beta-Lactamase      | Aztreonam MIC ( $\mu\text{g/ml}$ ) in the presence of varied concentrations of vaborbactam ( $\mu\text{g/ml}$ ) |      |              |              |              |              |              |              | MPC <sub>16</sub> |
|---------|---------------------|-----------------------------------------------------------------------------------------------------------------|------|--------------|--------------|--------------|--------------|--------------|--------------|-------------------|
|         |                     | 0                                                                                                               | 0.15 | 0.3          | 0.6          | 1.25         | 2.5          | 5            | 10           |                   |
| ECM6701 | KPC-2               | 16                                                                                                              | 0.25 | $\leq 0.125$ | $\leq 0.125$ | $\leq 0.125$ | $\leq 0.125$ | $\leq 0.125$ | $\leq 0.125$ | <b>&lt;0.15</b>   |
| ECM6702 | KPC-3               | 32                                                                                                              | 0.5  | 0.25         | $\leq 0.125$ | $\leq 0.125$ | $\leq 0.125$ | $\leq 0.125$ | $\leq 0.125$ | <b>&lt;0.15</b>   |
| ECM6696 | NMC-A               | 32                                                                                                              | 2    | 1            | 0.5          | 0.25         | $\leq 0.125$ | $\leq 0.125$ | $\leq 0.125$ | $\leq 0.15$       |
| ECM6706 | SME-2               | >128                                                                                                            | 4    | 2            | 1            | 0.5          | 0.25         | 0.25         | $\leq 0.125$ | <b>&lt;0.15</b>   |
| ECM6695 | CTX-M-3             | 4                                                                                                               | 1    | 0.5          | 0.25         | $\leq 0.125$ | $\leq 0.125$ | $\leq 0.125$ | $\leq 0.125$ | <b>0.6</b>        |
| ECM6693 | CTX-M-14            | 4                                                                                                               | 1    | 0.5          | 0.25         | 0.25         | $\leq 0.125$ | $\leq 0.125$ | $\leq 0.125$ | <b>0.6</b>        |
| ECM6694 | CTX-M-15            | 8                                                                                                               | 8    | 4            | 2            | 1            | 0.5          | 0.25         | $\leq 0.125$ | <b>2.5</b>        |
| ECM6718 | SHV-5               | 16                                                                                                              | 8    | 4            | 2            | 2            | 1            | 0.5          | 0.25         | <b>2.5</b>        |
| ECM6698 | SHV-12              | 32                                                                                                              | 32   | 16           | 16           | 8            | 8            | 4            | 2            | <b>10</b>         |
| ECM6699 | SHV-18              | 8                                                                                                               | 8    | 8            | 4            | 2            | 1            | 0.5          | 0.25         | <b>5</b>          |
| ECM6713 | TEM-10              | 32                                                                                                              | 32   | 32           | 32           | 16           | 8            | 8            | 2            | <b>10</b>         |
| ECM6714 | TEM-26              | 8                                                                                                               | 8    | 4            | 4            | 2            | 2            | 1            | 1            | <b>&gt;10</b>     |
| ECM6700 | CMY-2               | 4                                                                                                               | 2    | 2            | 2            | 1            | 0.5          | 0.25         | $\leq 0.125$ | <b>5</b>          |
| ECM6715 | AmpC-ECL (P99-like) | 8                                                                                                               | 8    | 8            | 4            | 2            | 1            | 0.5          | 0.25         | <b>5</b>          |
| ECM6691 | MIR-1               | 16                                                                                                              | 8    | 4            | 2            | 1            | 0.5          | 0.5          | 0.25         | <b>1.25</b>       |

42  
 43 MPC, minimal potentiation concentration, MPC<sub>16</sub>, concentration of vaborbactam required to reduce MIC 16-fold.



44 Vaborbactam concentrations are in bold italic.

45 The effect of increasing vaborbactam concentrations on aztreonam MICs in a panel of *E. coli* clones was determined. The concentration of  
46 vaborbactam required to reduce the MIC 16-fold (minimal potentiation concentration, MPC<sub>16</sub>) was used as a measure of vaborbactam potency.

47 Table S3 shows that vaborbactam had the highest inhibitory potency in strains producing KPC compared to other class A or C beta-lactamases; the  
48 MPC<sub>16</sub> for these class A carbapenemase-producing strains was ≤0.15 µg/ml. Vaborbactam was 8- to 32-fold less potent in strains producing  
49 ESBLs; the MPC<sub>16</sub> ranged from 0.6 to 2.5 µg/ml, from 1.25 to 5 µg/ml and from 5 to >10 µg/ml for CTX-M-, class C- and SHV/TEM-producing  
50 strains, respectively.

51

52

53

54

55

56

57

58

59 **Table S4. MICs of ceftazidime alone or in combination with vaborbactam against the panel of engineered *E. coli* strains producing**  
60 **various cloned metallo-beta-lactamases**

| Strain  | Beta-lactamase | Ceftazidime MIC ( $\mu\text{g/ml}$ ) |                                     |    |
|---------|----------------|--------------------------------------|-------------------------------------|----|
|         |                | alone                                | w/vaborbactam at 8 $\mu\text{g/ml}$ |    |
| ECM6704 | none           | $\leq 0.125$                         | $\leq 0.125$                        | 64 |
| ECM6909 | VIM-2          | <b>2</b>                             | 2                                   | 65 |
| ECM6903 | VIM-7          | <b>0.25</b>                          | 0.25                                |    |
| ECM6865 | SPM-1          | <b>1</b>                             | 1                                   | 66 |
| ECM6912 | GIM-1          | <b>16</b>                            | 16                                  | 67 |
| ECM6784 | IMP-13         | <b>64</b>                            | 64                                  |    |
| ECM6785 | IMP-18         | <b>&gt;64</b>                        | >64                                 | 68 |
| ECM6786 | IMP-15         | <b>64</b>                            | 64                                  |    |
| ECM6852 | CcrA1          | <b>32</b>                            | 32                                  | 69 |
| ECM6853 | L1             | <b>32</b>                            | 32                                  |    |

70

71

72 **Table S5. Relative expression of *acrB*, *ompK35* and *ompK36* in KPM1026a and its derivatives, KPM1027 and KPM1176**

| Genes                    | Strains  |                                     |         |
|--------------------------|----------|-------------------------------------|---------|
|                          | KPM1026a | KPM1027 <sup>2</sup><br>(ave±stdev) | KPM1176 |
| <i>ompK35</i>            | 1.00     | 0.14±0.02                           | 0.14    |
| <i>ompK36</i>            | 1.00     | 0.94±0.43                           | 0.44    |
| <i>acrB</i>              | 1.00     | 3.11±0.64                           | 3.88    |
| <i>rpoB</i> <sup>1</sup> | 1.00     | 1.00                                | 1.00    |

73

74 <sup>1</sup> The expression of *acrB*, *ompK35* and *ompK36* in each strain was normalized with the housekeeping gene *rpoB*. To calculate the level of expression relative to strain KPM1026a,  
 75 the normalized CT value of a gene in a test strain was subtracted from that of the same gene in KPM1026a, and the difference ( $\Delta$ CT) was used as a logarithmic power (base=2).

76 <sup>2</sup> Data for KPM1027 is the average of 3 tests.
